# Supplementary material
Source: HighWire-hosted journal article supplement (https://www.cmaj.ca/highwire/filestream/79476/field_highwire_adjunct_files/0/202663-image-1-at.pdf)

## **Lymphadenopathy associated with cat-scratch disease in a child**

Guifeng Chen MD<sup>1#</sup>, Zhongjie Li MD<sup>1#</sup>, Guodong Ding PhD<sup>2\*</sup>

<sup>1</sup>Department of Pediatrics, Jiashan No.1 People's Hospital, Jiashan, Zhejiang, China

<sup>2</sup>Department of Respiratory Medicine, Shanghai Children's Hospital, Shanghai Jiao Tong University, Shanghai, China

---

<sup>#</sup>Guifeng Chen and Zhongjie Li contributed equally to this work.

<sup>\*</sup>Corresponding to: Guodong Ding, Department of Respiratory Medicine, Shanghai Children's Hospital, Shanghai Jiao Tong University, 1400 West Beijing Road, Shanghai 200040, China. E-mail address: dingguodong@shchildren.com.cn.

## Figure Legends

**Figure S1 (panels A, B, C, D and E):** Grey-scale (A, B, and D) and color (C and E) Doppler ultrasonography of the right upper arm and axillae demonstrated well-defined, echogenic, hyperemic solid masses with prominent vascular pedicles typical of enlarged supratrochlear (A), epitrochlear (B and C), and axillary (D and E) lymph nodes (green arrow).

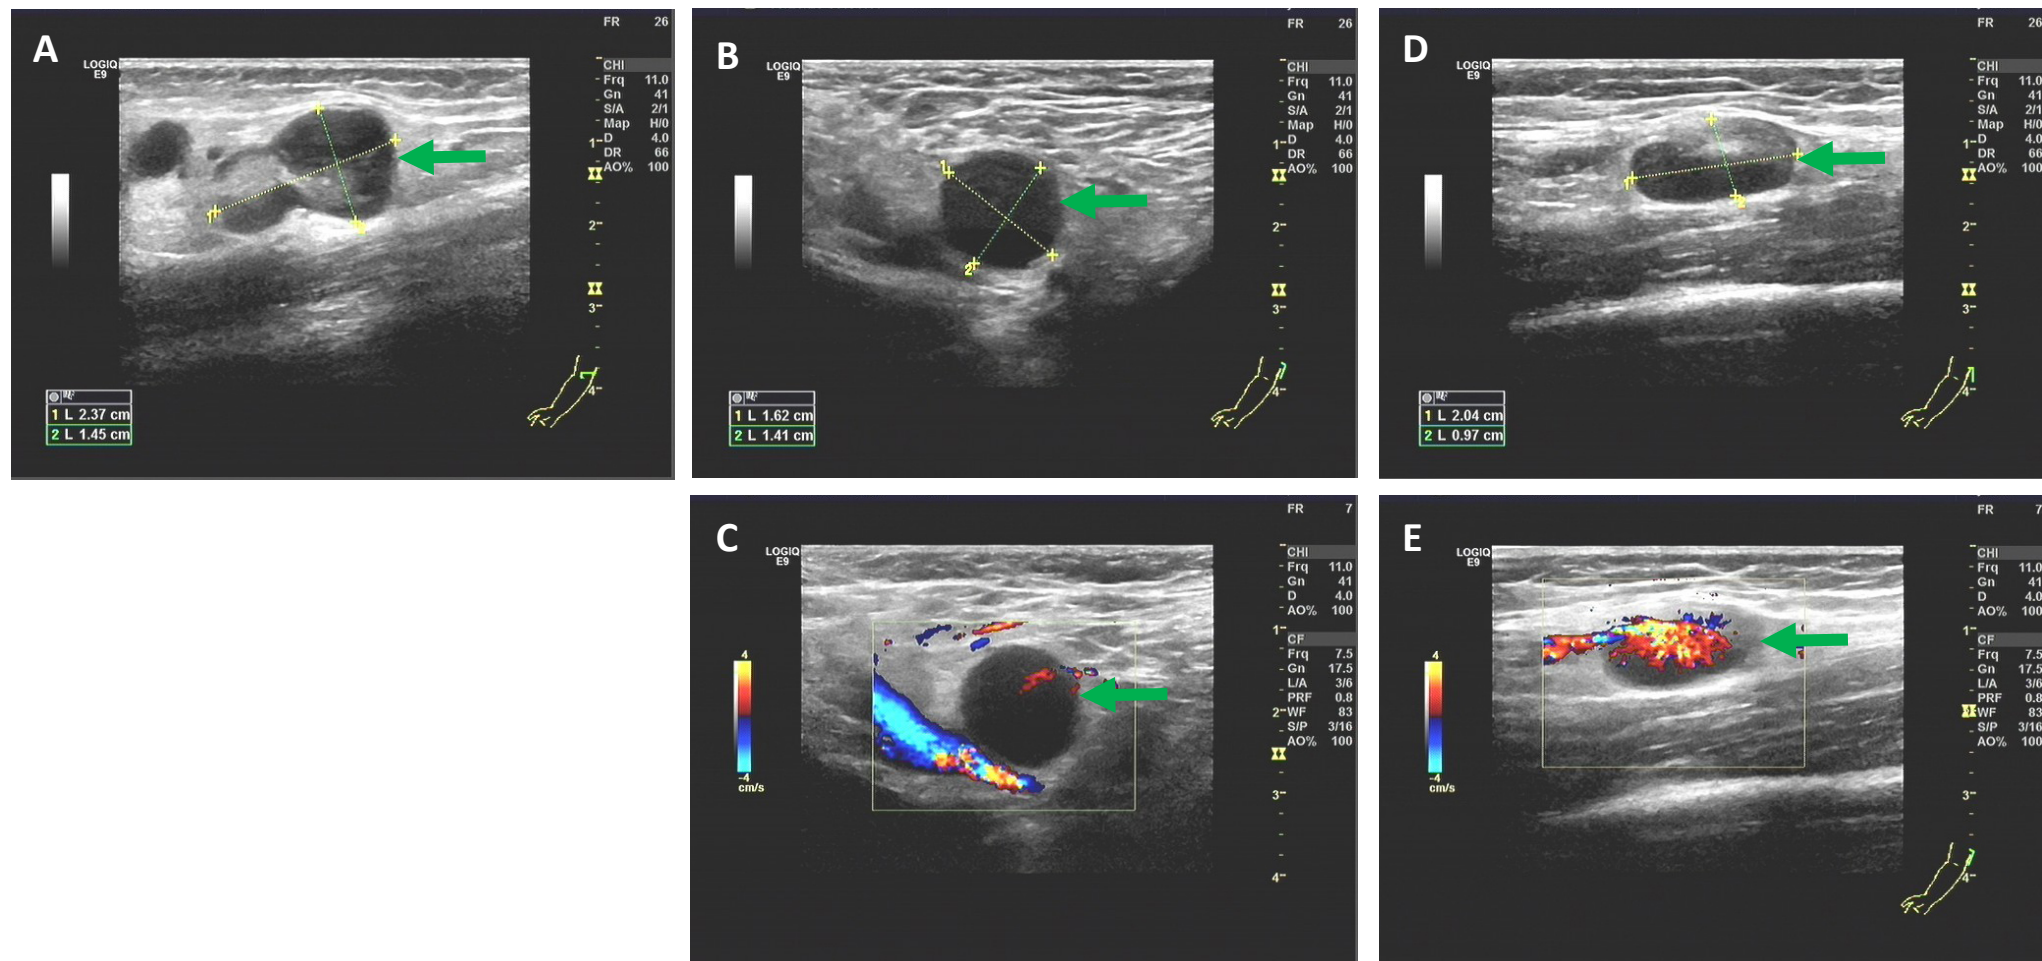

Supplement: 202663-image-1-at.pdf [file 202663-image-1-at.pdf]
